# Supplementary material for: Th2-skewed T cells correlate with B cell response to α-Gal and tick antigens in α-Gal syndrome
Source: PubMed Central journal article supplement (PMC10014093; doi:10.1172/jci158357), 2023-03-15
Supplement: jci-133-158357-s038.pdf [file jci-133-158357-s038.pdf]

## **Supplemental Material**

### **Th2-skewed T cells correlate with B cell response to $\alpha$ -Gal and tick antigens in $\alpha$ -Gal syndrome**

**Authors:** Danijela Apostolovic,<sup>1\*</sup> Jeanette Grundström,<sup>1</sup> M. B. Gea Kiewiet,<sup>1</sup> Marija Perusko,<sup>1,2</sup> Carl Hamsten,<sup>1</sup> Maria Starkhammar,<sup>3</sup> Staffan Paulie,<sup>4</sup> Marianne van Hage<sup>1</sup>

#### **Affiliations:**

<sup>1</sup>Division of Immunology and Allergy, Department of Medicine Solna, Karolinska Institutet and University Hospital; Solna, Sweden.

<sup>2</sup>University of Belgrade-Faculty of Chemistry, Innovative Centre, ltd; Belgrade, Serbia.

<sup>3</sup>Department of Internal Medicine, Södersjukhuset; Stockholm, Sweden.

<sup>4</sup>Mabtech AB; Stockholm, Sweden.

#### **\*Corresponding author:**

Danijela Apostolovic, PhD

Address: NKS BioClinicum J7:30, Immunology and Allergy Division, Visionsgatan 4, Solna SE17164, Sweden

Tel: +46 8 517 761 69

Email: danijela.apostolovic@ki.se

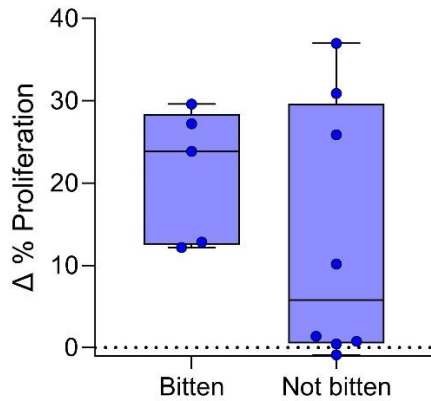

**Fig. S1** T cell proliferation to tick extract of healthy controls stratified based on tick bites. Mann-Whitney U-test,  $p = 0.35$ ,  $n = 5$  (bitten) and  $n = 8$  (non-bitten). Each point within the box plot represents one subject. Box plots represent IQR and median, whiskers extend to the farthest data points.

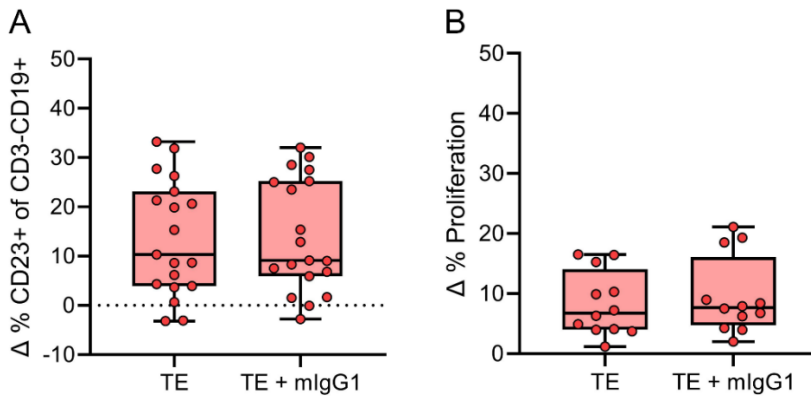

**Fig. S2.** Isotype control for blocking tick extract stimulation with anti-CD40L and anti-IL-4. (A) CD23 expression,  $n = 19$ ,  $p = 0.81$ , and (B) proliferation by B cells,  $n = 12$ ,  $p = 0.11$ . Wilcoxon matched-pairs signed rank test. Each point within the box plot represents one subject. Box plots represent IQR and median, whiskers extend to the farthest data points.

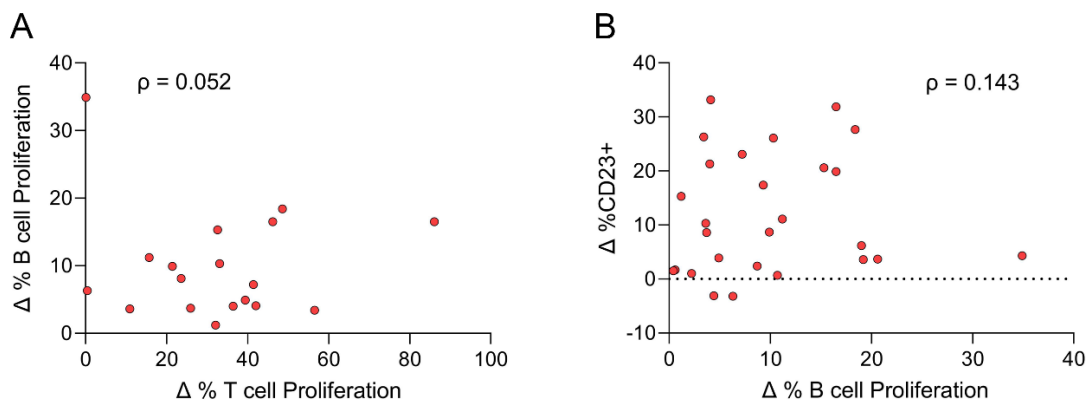

**Fig. S2.** Correlation between (A) B and T cell proliferation  $\rho = 0.052$ ,  $p = 0.84$ ,  $n = 18$ , and (B) CD23 expression and B cell proliferation  $\rho = 0.143$ ,  $p = 0.48$ ,  $n = 27$ . Spearman's rank correlation. Each point represents one subject.

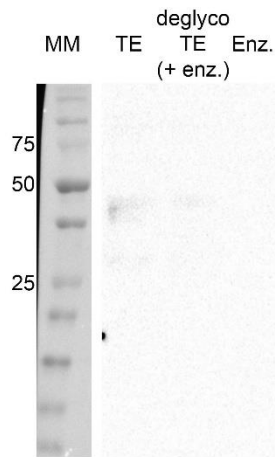

**Fig. S3.** Control serum binding to tick extract, deglycosylated tick extract and  $\alpha$ -galactosidase in western blot.

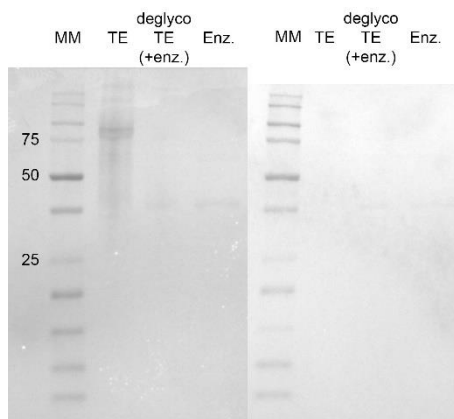

**Fig. S4.** Western blot for the presence of  $\alpha$ -Gal in tick extract and deglycosylated tick extract. Left: chicken scFv-anti- $\alpha$ -Gal as primary antibody, right: antibody control without primary antibody. MM = molecular marker, TE = tick extract, deglycoTE = deglycosylated TE, Enz. =  $\alpha$ -galactosidase from green coffee bean.
